# Supplementary material
Source: PubMed Central journal article supplement (PMC7857430)
Supplement: EMBR-22-e50967-s001.pdf [file EMBR-22-e50967-s001.pdf]

## **Appendix PDF contents**

1. Appendix Figure Legends (pages 1-13)
2. Appendix Figures S1-S17 (pages 14-30)
3. Appendix Table S1 (page 31)
4. Appendix Table S2 (pages 32-33)
5. Appendix Table S3 (pages 34)
6. Appendix Table S4 (pages 35)

## **Appendix Figure Legends**

### **Appendix Figure S1. HAT1 knockout HepG2 cell lines are established by the CRISPR-Cas9 system**

A. The expression levels of HAT1 were measured by Western blot analysis in 48 cell clones derived from HepG2 cells #1-#24 clones came from the SgRNA1-selected cells, and #25-#48 clones came from the SgRNA2-selected cells.

B. Three clones were selected by length polymorphisms of PCR product and validated by Sanger sequencing. Clone #3 and Clone #20, Clone #34 were generated by SgRNA1 and SgRNA2 that produced Clone #3 with 1-bp deletion and 2+bp insertion, 4-bp deletion and 1+bp insertion for Clone #20 and 2+bp and 1+bp insertion for two alleles of Clone #34 at different positions, respectively.

### **Appendix Figure S2. HAT1 is able to modulate succinylation on multiple proteins**

A. Total cell lysates from wild type (WT) and HAT1 knockout (KO) Clone 2 HepG2 cells were analyzed by Western blot analysis with the indicated pan-anti-Ksucc antibody and pan-anti-Kac antibody for Ksucc and Kac levels. The efficiency of HAT1 knockout was measured by Western blot analysis.

B. The levels of succinyl-CoA were analyzed by ELISA assays in HepG2 cells and HAT1 KO HepG2 cells. N = 3 biological replicates. Data were presented as mean  $\pm$  SD. Student's *t*-test, ns, no significance.

C. Total cell lysates from wild type (WT) and HAT1 knockout (KO) Clone 1 HepG2 cells were analyzed by Western blot analysis with the indicated antibodies for Kac, lysine butyrylation (Kbu), lysine crotonylation (Kcr), and lysine propionylation (Kpr) levels. The efficiency of HAT1 knockout was measured by Western blot analysis.

### **Appendix Figure S3. Succinylation quantitative proteomics identify proteins and sites of HAT1-mediated succinylation**

A. The schematic representation of the experimental workflow for the succinylation quantitative proteomics of HAT1-regulated succinylation was shown.

B. Venn diagram revealed the overlap between replications of the succinylation quantitative proteomics.

C. Histogram showed the Ksucc site distribution in the succinylation quantitative proteomics.

D. The consensus sequence logos demonstrated enrichment of amino acid residues among the HAT1-targeted Ksucc sites in the succinylation quantitative proteomics.

**Appendix Figure S4. HAT1-mediated succinylation is involved in multiple biological processes and pathways**

A-D. The succinylated proteins targeted by HAT1 were involved in many processes of physiology and pathology in the succinylation quantitative proteomics.

A. GO function enrichment analysis showed cellular biological process, molecular function, and cellular component with succinylated proteins targeted by HAT1.

B. Histogram revealed the relative fold change of Ksucc levels in the succinylation quantitative proteomics.

C. KEGG analysis showed the canonical pathway with succinylated proteins targeted by HAT1 in the succinylation quantitative proteomics.

D. Protein domain analysis demonstrated the specific domain of succinylated proteins targeted by HAT1 in the succinylation quantitative proteomics.

**Appendix Figure S5. HAT1 is a novel histone succinyltransferase**

A. Histones were extracted from HepG2 (WT) and HAT1 knockout (KO) Clone 2 HepG2 cells. The total histone succinylation and acetylation levels were analyzed by Western blot analysis in the cells. The histone levels were measured by GelCode Blue staining. The efficiency of HAT1 knockout was measured by Western blot analysis.

B. Histone H3 was immunoprecipitated from HepG2 cells with or without endogenous HAT1 depletion (by knockout). The levels of succinylation, acetylation, histone H3, HAT1, and  $\beta$ -actin were analyzed by Western blot analysis in the cells.

C. The efficiency of HAT1 shRNAs was validated by Western blot analysis in 293T cells

transfected with indicated shHAT1. Three shRNAs targeting HAT1 mRNA were designed, among which shHAT1-3 showed the strongest knockdown efficiency and was used in the following experiments.

D, E. Histone H3 was immunoprecipitated from PANC1 and HuCCT1 cells with or without endogenous HAT1 depletion (by shRNA). The levels of succinylation, acetylation, histone H3, HAT1, and  $\beta$ -actin were analyzed by Western blot analysis in the cells.

F. HAT1-catalyzed histone H3 acylation was analyzed by *in vitro* acylation assays using Western blot analysis after mixing purified HAT1, histone H3, and succinyl-CoA/butyryl-CoA/crotonyl-CoA/propionyl-CoA.

#### **Appendix Figure S6. T188 of HAT1 is critical for HAT1-mediated succinylation**

A. Two-dimensional (2D) diagram showed the catalytic pocket of HAT1 that bound to succinyl-CoA.

B. Histone H3 proteins were immunoprecipitated from HAT1 KO HepG2 cells, and HAT1 KO HepG2 cells re-expressed with HAT1 or indicated HAT1 mutants. The levels of succinylation, acetylation, histone H3, HAT1, and  $\beta$ -actin were determined by Western blot analysis in the cells.

C, D. The steady-state kinetics of HAT1-mediated histone H3 modifications was shown. Immunoprecipitated wild type Flag-HAT1 or Flag-HAT1 (T188A) from 293T cells was incubated with purified histone H3 in the presence of acetyl-CoA or succinyl-CoA. The steady-state kinetics of HAT1 activity was determined by measuring CoA production. The  $K_m$  values of wild type Flag-HAT1 for histone H3 acetylation and succinylation were  $1.08 \pm 0.14$

$\mu\text{M}$  (means  $\pm$  S.D.) and  $0.61 \pm 0.10 \mu\text{M}$ , respectively. The  $K_m$  values of Flag-HAT1 (T188A) for histone H3 acetylation and succinylation were  $1.15 \pm 0.14 \mu\text{M}$  and  $1.57 \pm 0.37 \mu\text{M}$ , respectively. The steady-state kinetic curves showed the mean values from three independent measurements ( $n=3$ ). The  $V_{\text{max}}$  values of wild type Flag-HAT1 for histone H3 acetylation and succinylation were  $1.58 \pm 0.05 \text{ nM s}^{-1}$  (mean  $\pm$  S.D.) and  $1.75 \pm 0.07 \text{ nM s}^{-1}$ , respectively. The  $V_{\text{max}}$  values of Flag-HAT1 (T188A) for histone H3 acetylation and succinylation were  $1.56 \pm 0.05 \text{ nM s}^{-1}$  and  $0.68 \pm 0.04 \text{ nM s}^{-1}$ , respectively. The data were presented as means  $\pm$  S.D. from three independent experiments ( $n=3$ ).  $N = 3$  biological replicates. Data were presented as mean  $\pm$  SD. Student's  $t$ -test, \*\*\* $P < 0.001$ ; ns, no significance.

E, F. Histone H3 was immunoprecipitated from PANC1 and HuCCT1 cells depleted endogenous HAT1 and in the cells reconstituted expression of HAT1 or HAT1 mutant (T188A). The levels of succinylation, acetylation, histone H3, HAT1, and  $\beta$ -actin were analyzed by Western blot analysis in the cells.

G. Histone H3 was immunoprecipitated from HepG2, HAT1 KO Clone 1 HepG2, and HAT1 KO Clone 1 HepG2 cells reconstituted expression of HAT1 or HAT1 mutant (T188A). The levels of succinylation, acetylation, butyrylation, crotonylation, propionylation, histone H3, HAT1, and  $\beta$ -actin were analyzed by Western blot analysis.

## **Appendix Figure S7. HAT1 catalyzes histone H3K122 succinylation for epigenetic regulation**

A. The diagram showed the succinylated histone sites identified in the succinylation quantitative proteomics.

B. The diagram showed the ratios of histone succinylation sites targeted by HAT1 in the succinylation quantitative proteomics.

C. The levels of histone H3K122 succinylation, histone H3K122 acetylation, histone H3K27 acetylation, histone H3, HAT1, and  $\beta$ -actin were determined by Western blot analysis in HepG2, HAT1 knockout (KO) Clone 2 HepG2 cells, and in the cells reconstituted expression of HAT1 or HAT1 mutant (T188A).

D. The levels of histone H3K122 succinylation, histone H3K27 acetylation, histone H3, HAT1, and  $\beta$ -actin were examined by Western blot analysis in PANC1, and PANC1 cells depleted endogenous HAT1, or HuCCT1 and HuCCT1 cells depleted endogenous HAT1.

E. The levels of histone H3K122 succinylation, histone H3K27 acetylation, histone H3, HAT1, and  $\beta$ -actin were examined by Western blot analysis in PANC1, or HuCCT1 cells depleted endogenous HAT1, and in the cells reconstituted expression of HAT1 or HAT1 mutant (T188A).

F. HAT1-mediated histone H3K122 succinylation was analyzed by mixing purified HAT1, histone H3, and succinyl-CoA (2  $\mu$ M) with or without acetyl-CoA (2  $\mu$ M). Western blot analysis was performed with the indicated antibodies.

G. The H3K122succ-ChIP peaks and HAT1-ChIP peaks were identified by ChIP-seq in HepG2 cells. Venn diagram showed the overlap of H3K122 succinylation and HAT1 common occupied peaks.

H. The diagram showed the genomic distributions of ChIP-seq peaks for H3K122 succinylation and HAT1 in HepG2 cells.

**Appendix Figure S8. Representative tracks of gene peaks from H3K122 succinylation ChIP-seq**

A. The representative tracks of gene peaks from H3K122 succinylation ChIP-seq were showed.

**Appendix Figure S9. HAT1 catalyzes histone H3K122 succinylation for gene expression regulation**

A, B. The effect of HAT1 on histone H3K122 succinylation and histone H3K122 acetylation at the indicated gene promoters was determined by ChIP assay with an anti-H3K122 succinylation antibody and anti-H3K122 acetylation antibody, and quantitative PCR with primers of the promoter regions of CREBBP, BPTF and RPTOR in PANC1/HuCCT1 cells, PANC1/HuCCT1 cells depleted endogenous HAT1, and PANC1/HuCCT1 cells depleted endogenous HAT1 and reconstituted expression of HAT1 or HAT1 mutant (T188A). N = 3 biological replicates. Data were presented as mean  $\pm$  SD. Student's *t*-test, \*\*\**P*<0.001; ns, no significance.

C, D. The mRNA levels of CREBBP, BPTF, and RPTOR were measured by RT-qPCR in PANC1/HuCCT1 cells, PANC1/HuCCT1 cells depleted endogenous HAT1 and PANC1/HuCCT1 cells depleted endogenous HAT1 and reconstituted expression of HAT1 or HAT1 mutant (T188A). N = 3 biological replicates. Data were presented as mean  $\pm$  SD. Student's *t*-test, \*\**P*<0.01.

E. The levels of histone H3K122 succinylation, histone H3K79 succinylation, histone H3K9 acetylation, histone H3, KAT2A, and  $\beta$ -actin were assessed by Western blot analysis in

HepG2 and HepG2 cells depleted endogenous KAT2A. The levels of histone H3K79 succinylation, histone H3K27 acetylation, histone H3, HAT1, and  $\beta$ -actin were assessed by Western blot analysis in HepG2 and HepG2 cells depleted endogenous HAT1.

#### **Appendix Figure S10. The interaction analysis of HAT1-modulated succinylation**

A. The interaction analysis showed that HAT1-mediated succinylation targeted glycolysis.

#### **Appendix Figure S11. HAT1-mediated non-histone succinylation specifically targets glycolysis**

A, B. The decrease of glucose and increase of lactate in culture medium were measured by ELISA assays in PANC1/HuCCT1 cells, PANC1/HuCCT1 cells depleted endogenous HAT1, and PANC1/HuCCT1 cells depleted endogenous HAT1 and reconstituted expression of HAT1 or HAT1 mutant (T188A). N = 3 biological replicates. Data were presented as mean  $\pm$  SD. Student's *t*-test, \*\**P* < 0.01.

C-F. The relative amounts of indicated metabolites were quantified by ELISA assays in PANC1/HuCCT1 cells, PANC1/HuCCT1 cells depleted endogenous HAT1, and PANC1/HuCCT1 cells depleted endogenous HAT1 and reconstituted expression of HAT1 or HAT1 mutant (T188A). N = 3 biological replicates. Data were presented as mean  $\pm$  SD. Student's *t*-test, \*\**P* < 0.01; ns, no significance.

#### **Appendix Figure S12. HAT1 modulates succinylation of PGAM1**

A. PGAM1 was immunoprecipitated from HepG2, HAT1 KO Clone 2 HepG2, and HAT1 KO

Clone 2 HepG2 cells reconstituted expression of HAT1 or HAT1 mutant (T188A). The levels of succinylation, PGAM1, HAT1, and  $\beta$ -actin were analyzed by Western blot analysis in the cells.

B. PGAM1 was immunoprecipitated from PANC1/HuCCT1, PANC1/HuCCT1 cells depleted endogenous HAT1, and PANC1/HuCCT1 cells depleted endogenous HAT1 and reconstituted expression of HAT1 or HAT1 mutant (T188A). The levels of succinylation, PGAM1, HAT1, and  $\beta$ -actin were analyzed by Western blot analysis in the cells.

C. ENO1 or PKM was immunoprecipitated from HepG2, HAT1 KO HepG2, and HAT1 KO HepG2 cells reconstituted expression of HAT1 or HAT1 mutant (T188A). The levels of succinylation, ENO1 or PKM, HAT1, and  $\beta$ -actin were analyzed by Western blot analysis in the cells.

D. The relative enzyme activity of PGAM1, ENO1, and PKM was measured by the enzyme activity assays in the indicated tumor cells. N = 3 biological replicates. Data were presented as mean  $\pm$  SD. Student's *t*-test, \**P*<0.05; \*\**P*<0.01.

E. PGAM1 was immunoprecipitated from HepG2, HAT1 KO Clone 1 HepG2, and HAT1 KO Clone 1 HepG2 cells reconstituted expression of HAT1 or HAT1 mutant (T188A). The levels of succinylation, acetylation, butyrylation, crotonylation, propionylation, PGAM1, HAT1, and  $\beta$ -actin were analyzed by Western blot analysis.

F. The effect of HAT1 on histone H3K122 succinylation and histone H3K122 acetylation at PGAM1 promoter was determined by ChIP assays with anti-H3K122 succinylation antibody and anti-H3K122 acetylation antibody, and followed by quantitative PCR with primer of the promoter region of PGAM1 in WT HepG2 cells, HAT1 KO HepG2 cells and HAT1 KO

HepG2 cells reconstituted expression of HAT1 or HAT1 mutant (T188A). N = 3 biological replicates. Data were presented as mean  $\pm$  SD. Student's *t*-test, ns, no significance.

G. The mRNA levels of PGAM1 were measured by RT-qPCR in HepG2 cells, HAT1 KO HepG2 cells, and HAT1 KO HepG2 cells reconstituted expression of HAT1 or HAT1 mutant (T188A). N = 3 biological replicates. Data were presented as mean  $\pm$  SD. Student's *t*-test, ns, no significance.

#### **Appendix Figure S13. HAT1 is able to directly succinylate PGAM1**

A, B. The decrease of 2-PG and increase of 3-PG were measured by ELISA assays in PANC1/HuCCT1 cells, PANC1/HuCCT1 cells depleted endogenous HAT1, and PANC1/HuCCT1 cells depleted endogenous HAT1 and reconstituted expression of HAT1 or HAT1 mutant (T188A). N = 3 biological replicates. Data were presented as mean  $\pm$  SD. Student's *t*-test, \*\**P* < 0.01.

C. HAT1-catalyzed PGAM1 acylation was analyzed by *in vitro* acylation assays using Western blot analysis after mixing purified HAT1, PGAM1, and succinyl-CoA/butyryl-CoA.

D. HAT1-catalyzed PGAM1 acylation was analyzed by *in vitro* acylation assays using Western blot analysis after mixing purified HAT1, PGAM1, and succinyl-CoA/crotonyl-CoA.

E. HAT1-catalyzed PGAM1 acylation was analyzed by *in vitro* acylation assays using Western blot analysis after mixing purified HAT1, PGAM1, and succinyl-CoA/propionyl-CoA.

F. HAT1-catalyzed PGAM1 succinylation was analyzed by mixing purified HAT1 and

succinyl-CoA, and purified PGAM1 or PGAM1 mutant in the *in vitro* succinylation assays.

Western blot analysis was performed with indicated antibodies.

#### **Appendix Figure S14. HAT1 succinylates PGAM1 to enhance glycolysis**

A. The purified HAT1, PGAM1, and succinyl-CoA were mixed in the *in vitro* succinylation assays. And the relative PGAM1 activity was measured by the PGAM1 activity assays *in vitro*. N = 3 biological replicates. Data were presented as mean  $\pm$  SD. Student's *t*-test,  $**P < 0.01$ .

B. The relative activity of PGAM1 and PGAM1 mutant (K to E) were analyzed by the PGAM1 activity assays *in vitro*. N = 3 biological replicates. Data were presented as mean  $\pm$  SD. Student's *t*-test,  $**P < 0.01$ .

C. The efficiency of PGAM1 shRNAs was validated by Western blot analysis in 293T cells transfected with indicated shPGAM1. Three shRNAs targeting PGAM1 mRNA were designed, among which shPGAM1-2 showed the strongest knockdown efficiency and was used in the following experiments.

D, E. The decrease of glucose and increase of lactate in the culture medium and the relative amounts of 2-PG and 3-PG were analyzed by ELISA assays in PANC1/HuCCT1 cells depleted endogenous PGAM1 and reconstituted expression of PGAM1 or PGAM1 mutant (K99R). N = 3 biological replicates. Data were presented as mean  $\pm$  SD. Student's *t*-test,  $**P < 0.01$ .

#### **Appendix Figure S15. HAT1-mediated succinylation displays critical roles in tumor**

## **growth**

A-E. PANC1 cells, PANC1 cells depleted endogenous HAT1, and PANC1 cells depleted endogenous HAT1 and reconstituted expression of HAT1 or HAT1 mutant (T188A), were subcutaneously injected into athymic nude mice (N=6).

A, B. Photographs showed the tumors from the nude mice. Tumor volumes and average tumor weight were calculated. N = 6 biological replicates. Data were presented as mean  $\pm$  SD. Student's *t*-test, \*\*\**P*<0.001.

C. Immunohistochemical analysis of the indicated tumor sections was performed with an anti-Ki67 antibody. The images represented the results of six tissue slides.

D. Western blot analysis was performed with the indicated antibodies. Representative images of triplicate experiments were shown.

E. The relative amounts of 3-PG and 2-PG were determined by ELISA assays in the tumor tissues. N = 6 biological replicates. Data were presented as mean  $\pm$  SD. Student's *t*-test, \*\**P*<0.01.

## **Appendix Figure S16. The succinylation of PGAM1 plays a crucial role in tumor growth**

A-E. PANC1 cells depleted endogenous PGAM1 and reconstituted expression of PGAM1, or PGAM1 mutant (T188A) were subcutaneously injected into athymic nude mice (N=6).

A, B. Photographs showed the tumors from the nude mice. The average tumor weight and

tumor volumes were calculated. N = 6 biological replicates. Data were presented as mean  $\pm$  SD. Student's *t*-test, \*\*\**P* < 0.001.

C. Immunohistochemical analysis of the indicated tumor sections was performed with an anti-Ki67 antibody. The images represented the results of six tissue slides.

D. Western blot analysis was performed with the indicated antibodies. Representative images of triplicate experiments were shown.

E. The relative amounts of 3-PG and 2-PG were determined by ELISA assays in the tumor tissues. N = 6 biological replicates. Data were presented as mean  $\pm$  SD. Student's *t*-test, \*\*\**P* < 0.001.

**Appendix Figure S17. Histone acetyltransferase 1 is a succinyltransferase for histones and non-histones in liver cancer**

A model of succinylation mediated by HAT1. As a writer, HAT1 affects K<sub>succ</sub> levels on various proteins, including histones and non-histones, which is involved in multiple cellular pathways of physiology and pathology. For histones, HAT1 is a novel histone succinyltransferase and enhances epigenetic regulation and gene expression profiling by catalyzing histone H3K122 succinylation. For non-histones, HAT1 facilitates glycolysis through catalyzing the succinylation of PGAM1 on K99 in tumor cells. Functionally, HAT1-mediated succinylation is essential for the progression of liver cancer.

Yang G, et al. Appendix Figure S1

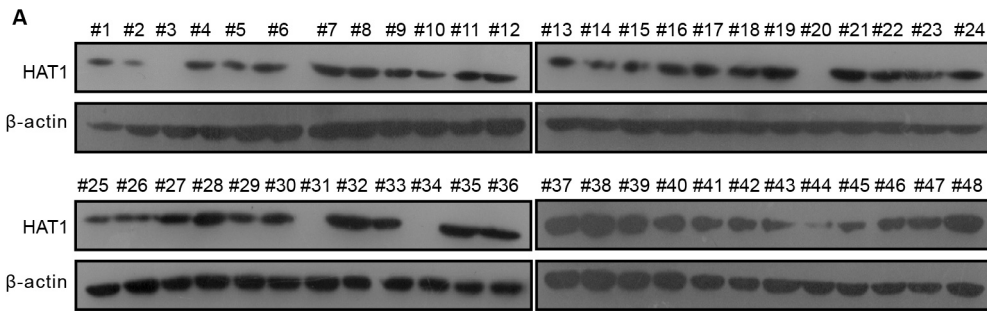

**B**

|                       |                                      |        |
|-----------------------|--------------------------------------|--------|
| SgRNA1 Site           | TCCCTAGGCTGACATGACATGTAGAGGCTTT      | Indels |
| Clone#3<br>(Clone 1)  | TCCCTAGGCTGACATGACA .....GTAGAGGCTTT | -1bp   |
|                       | TCCCTAGGCTGACATGACATGGCTAGAGGCTTT    | +2bp   |
| SgRNA1 Site           | TCCCTAGGCTGACATGACATGTAGAGGCTTT      | Indels |
| Clone#20<br>(Clone 2) | TCCCTAGGCTGACATGA .....TAGAGGCTTT    | -4bp   |
|                       | TCCCTAGGCTGACATGACATTGTAGAGGCTTT     | +1bp   |
| SgRNA2 Site           | TGGAGCTACGCTCTTTGCGACCGTAGGCTAC      | Indels |
| Clone#34              | TGGAGCTACGCTCTTTGCGACTGACGTAGGCTAC   | +2bp   |
|                       | TGGAGCTACGCTCTTTGCGATCCGTAGGCTAC     | +1bp   |

Yang G, et al. Appendix Figure S2

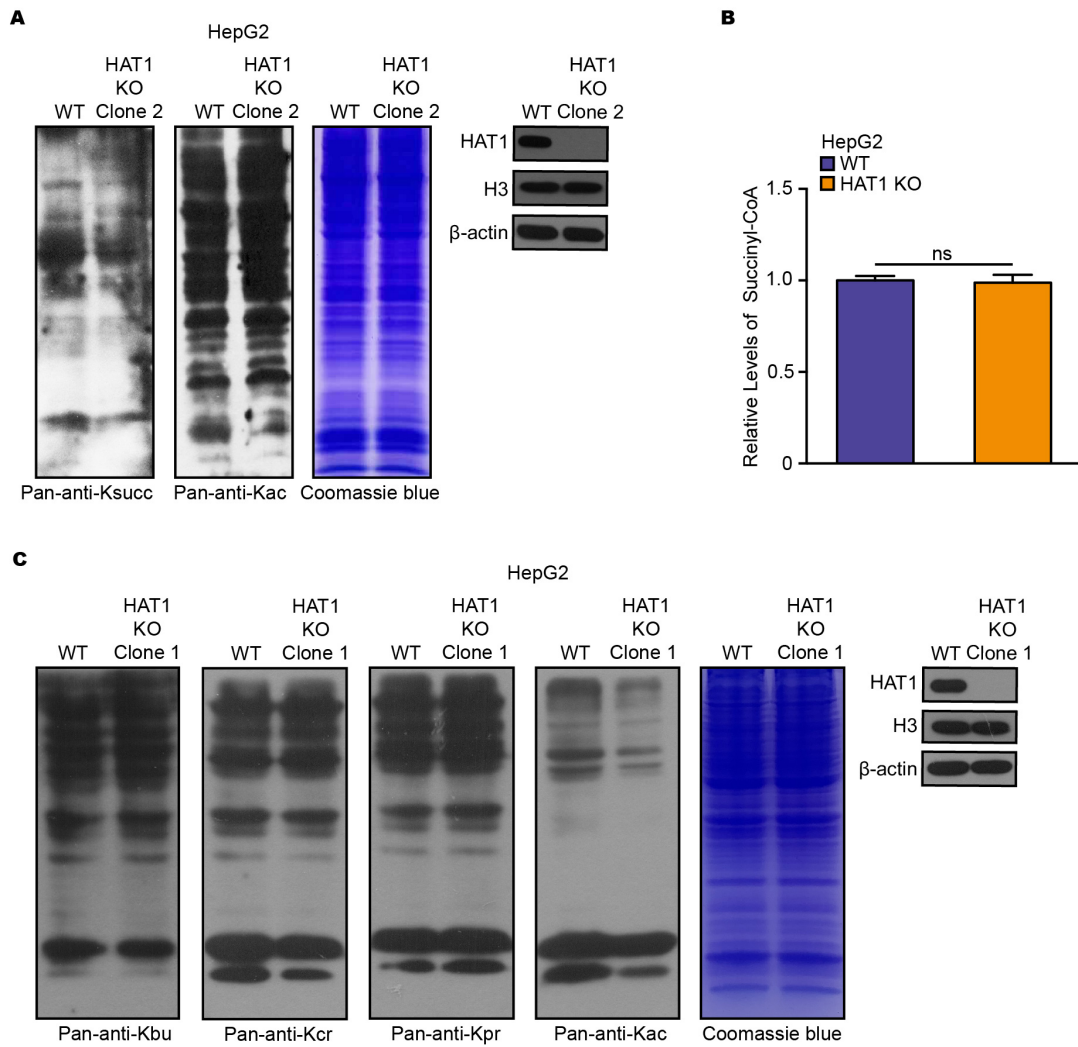

Yang G, et al. Appendix Figure S3

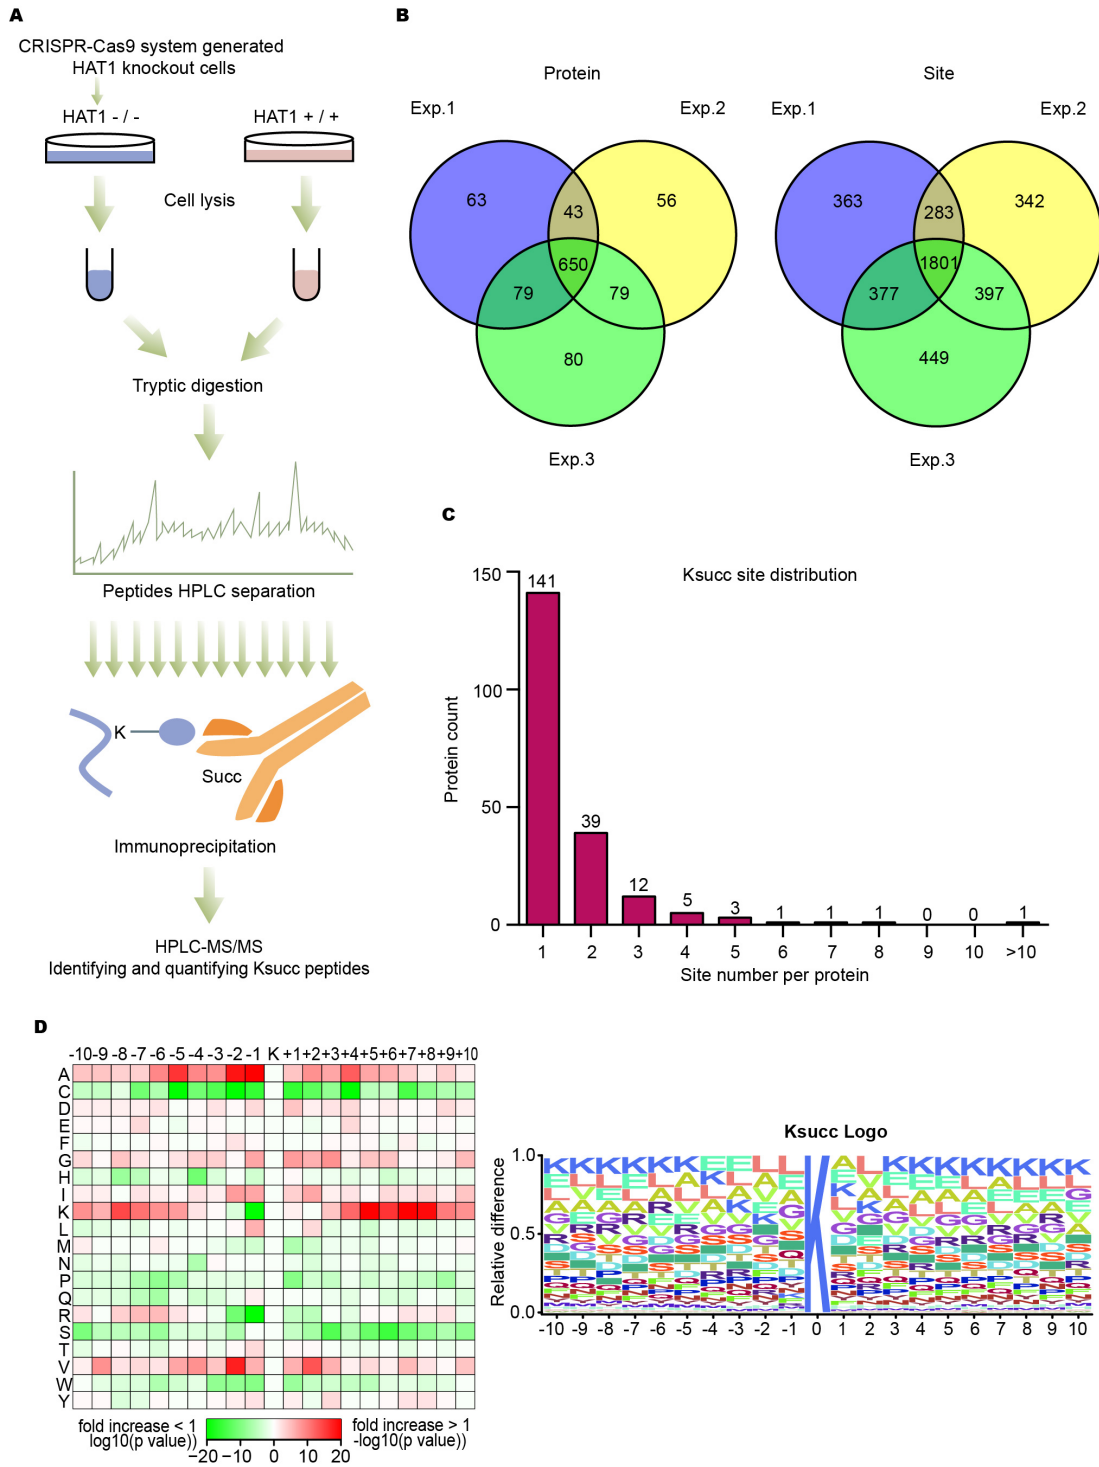

**A** GO analysis

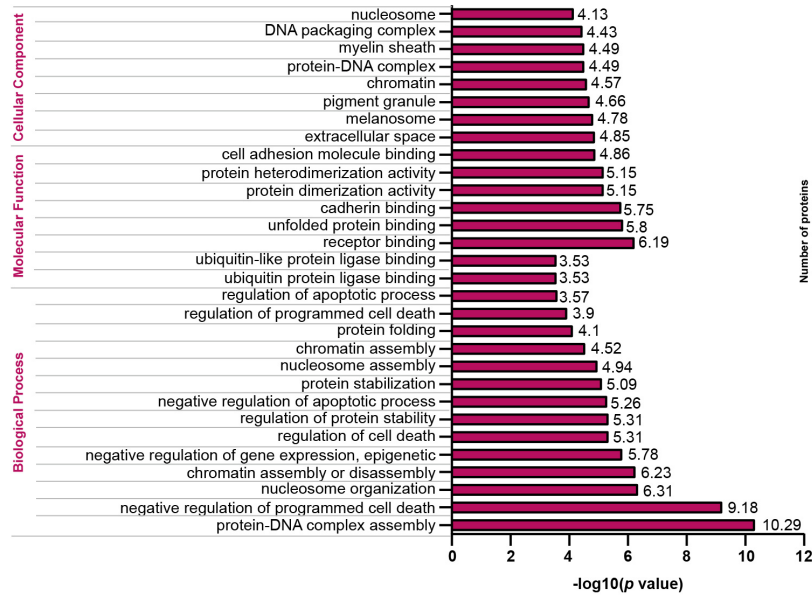

**B**

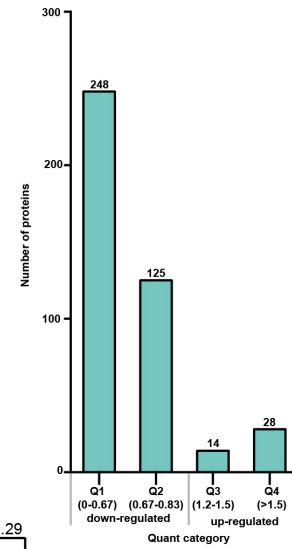

**C**

KEGG pathway

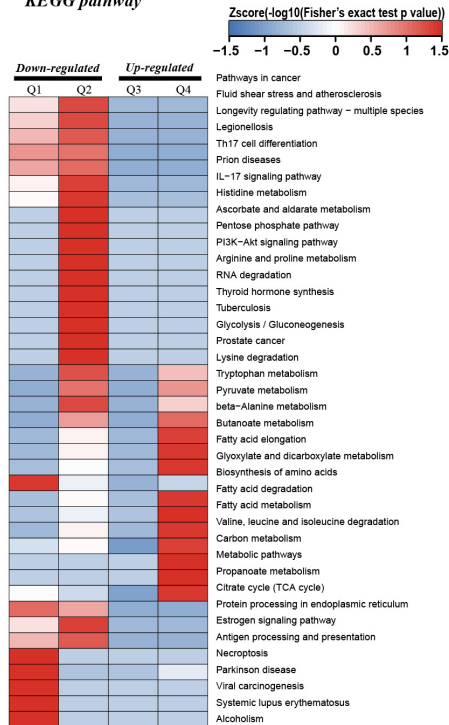

**D**

Protein domain

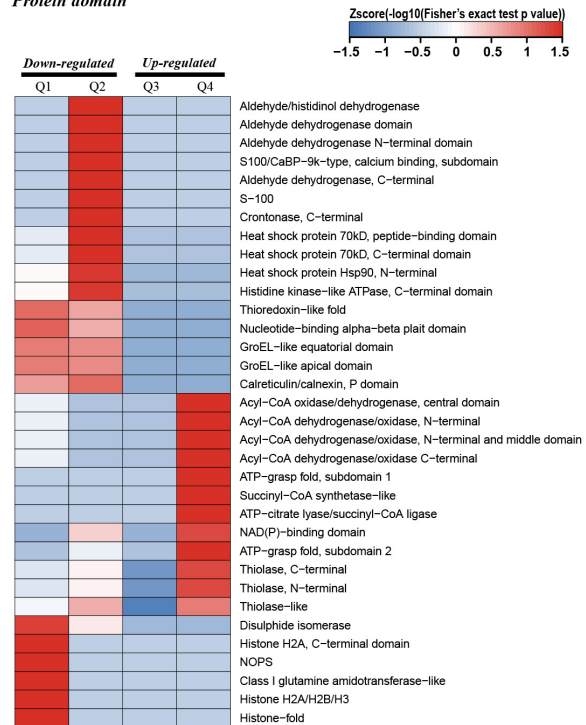

Yang G, et al. Appendix Figure S5

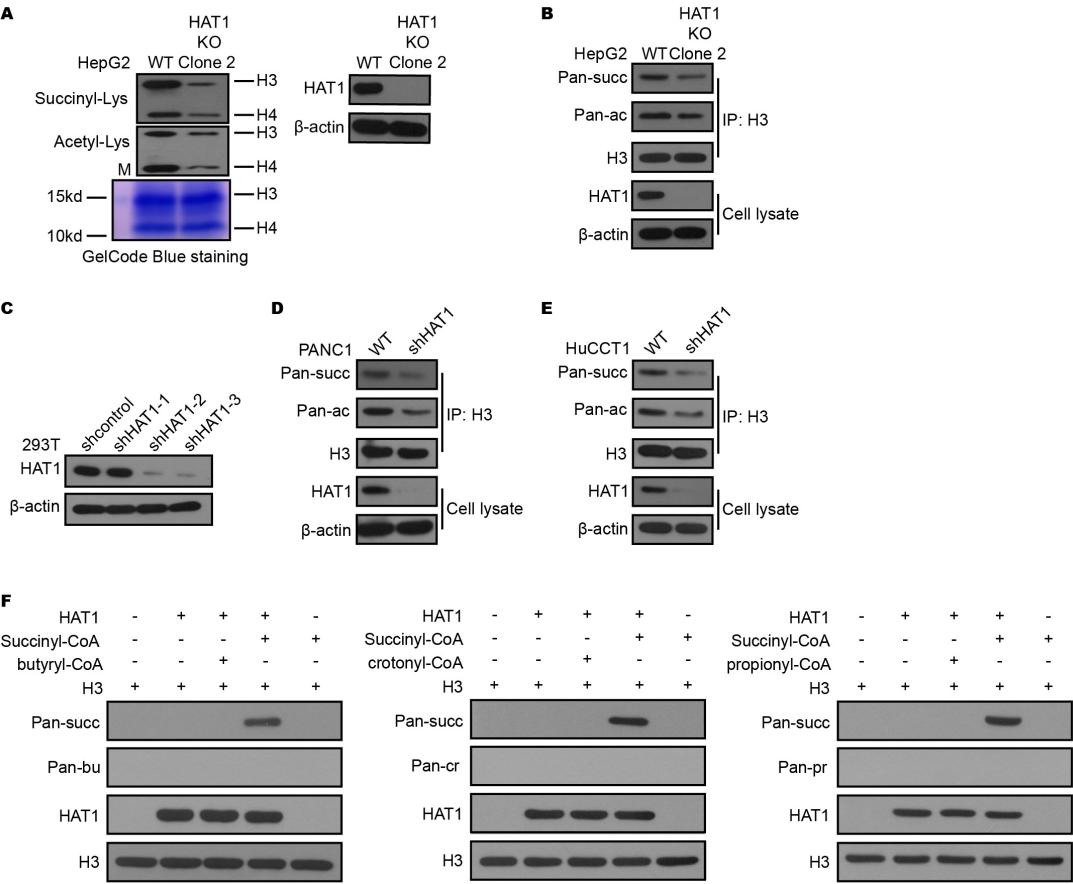

**A**

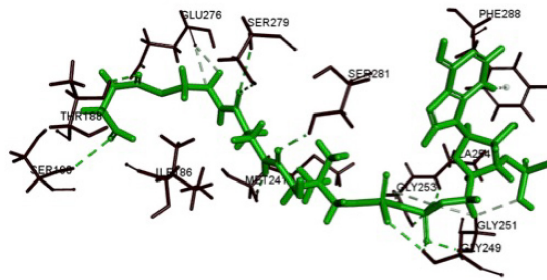

**B**

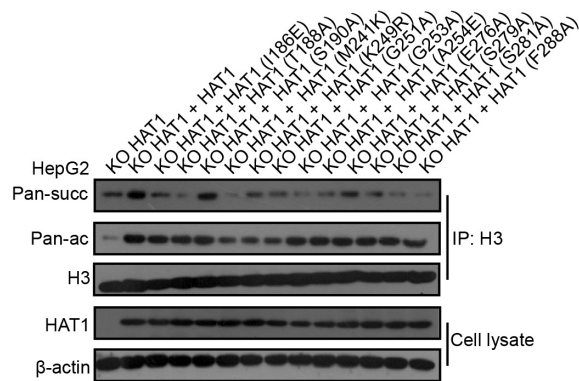

**C**

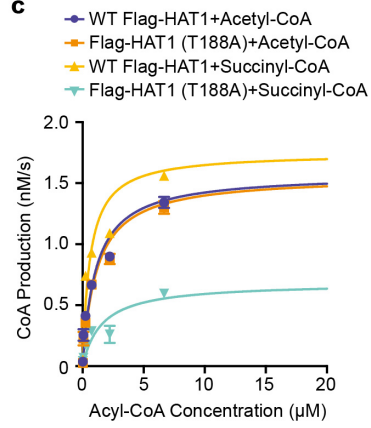

**D**

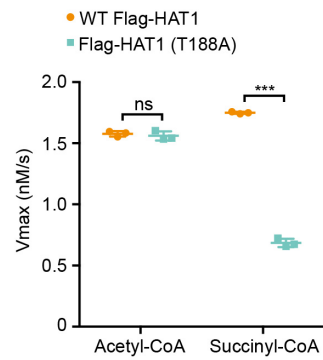

**G**

**E**

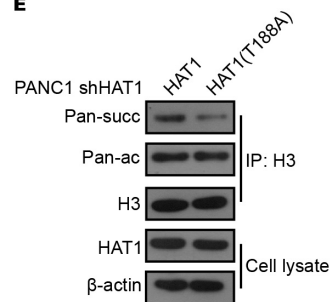

**F**

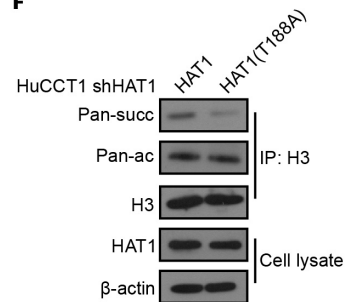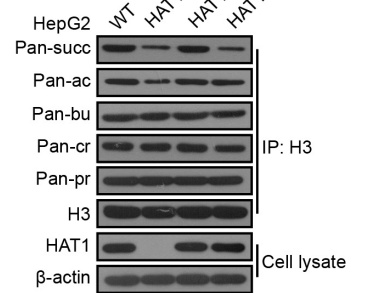

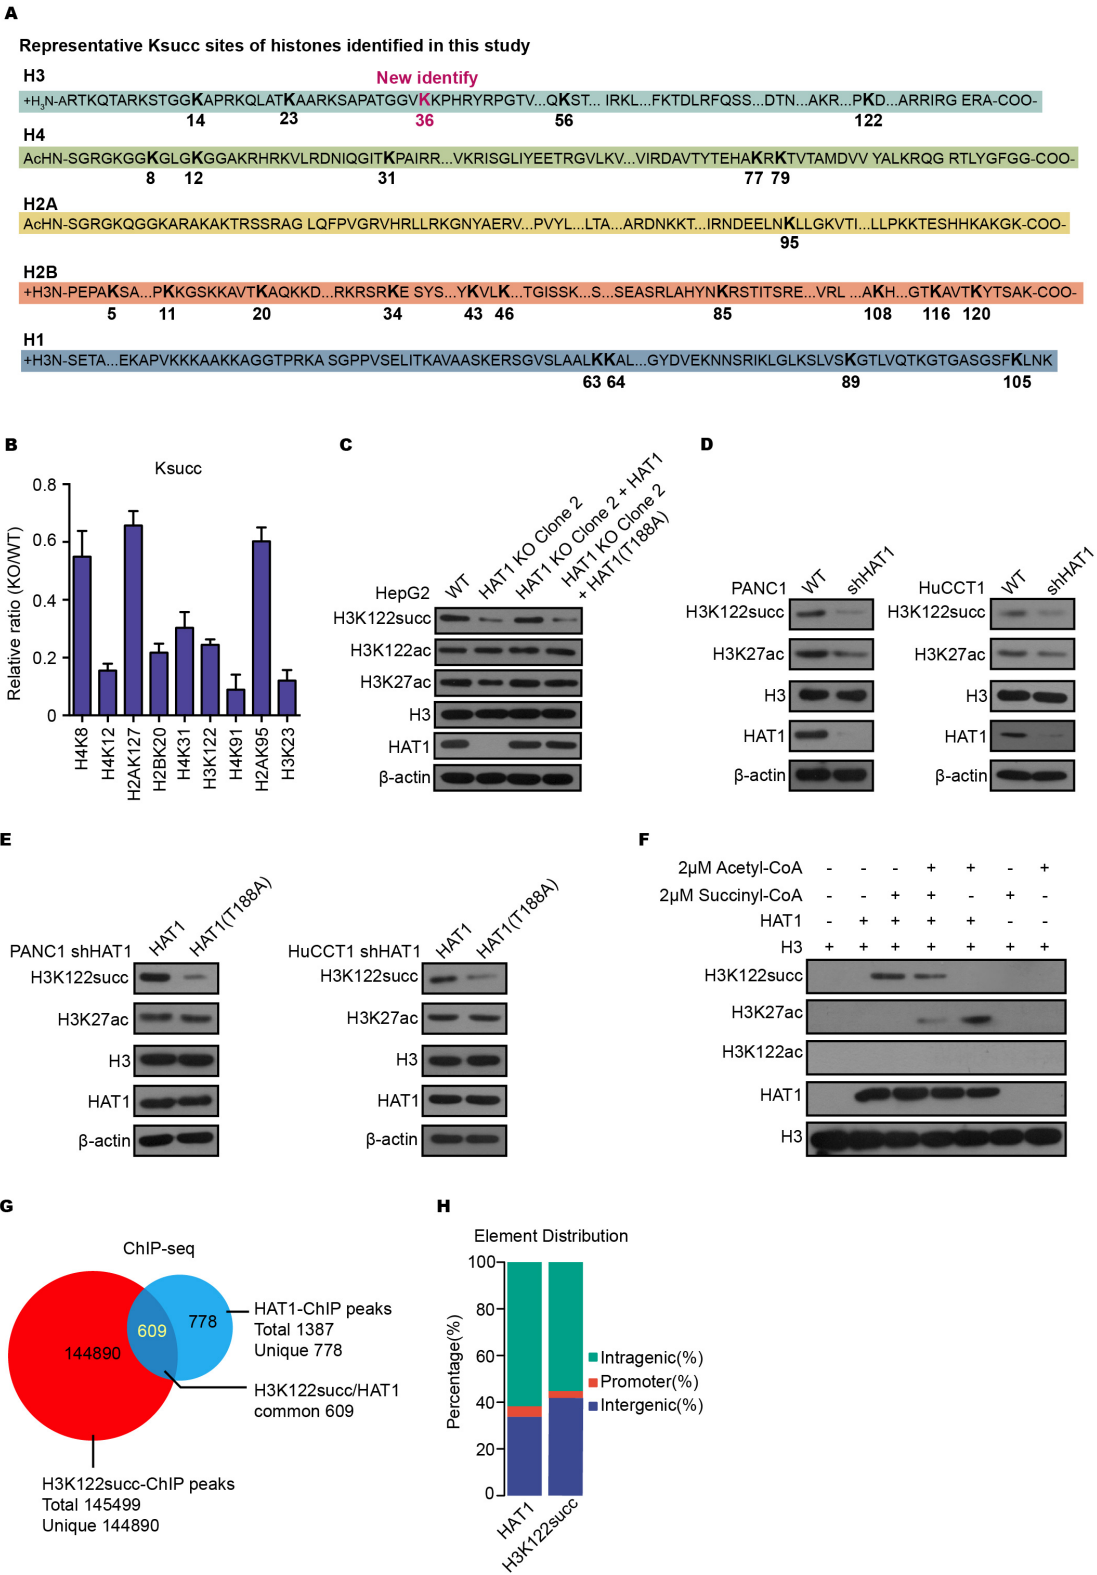

**A**

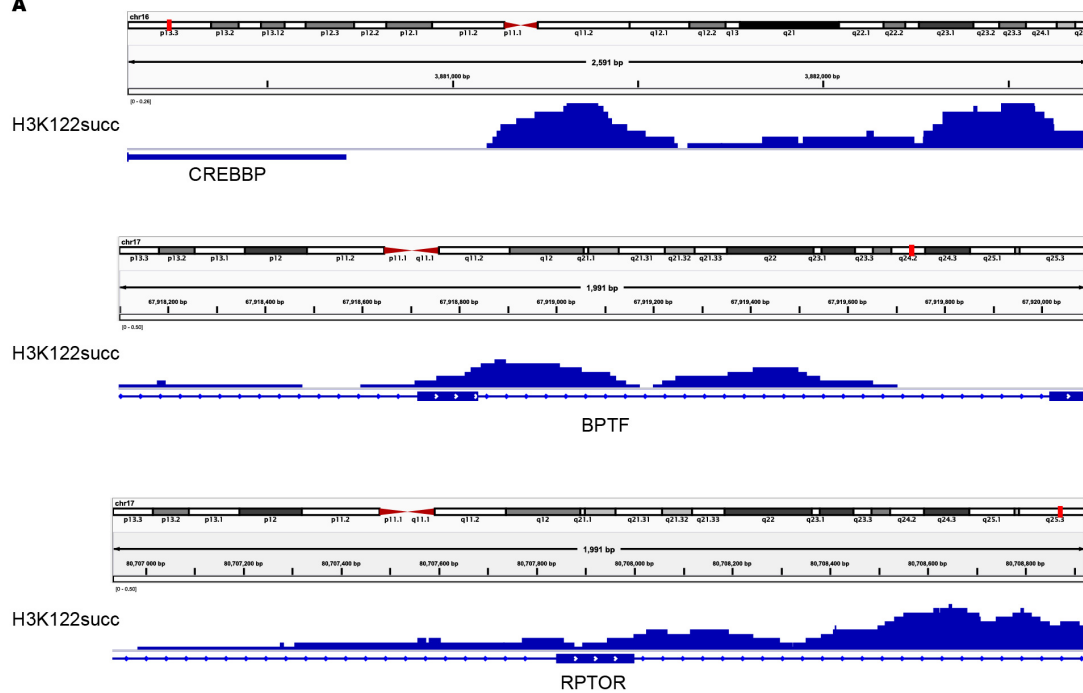

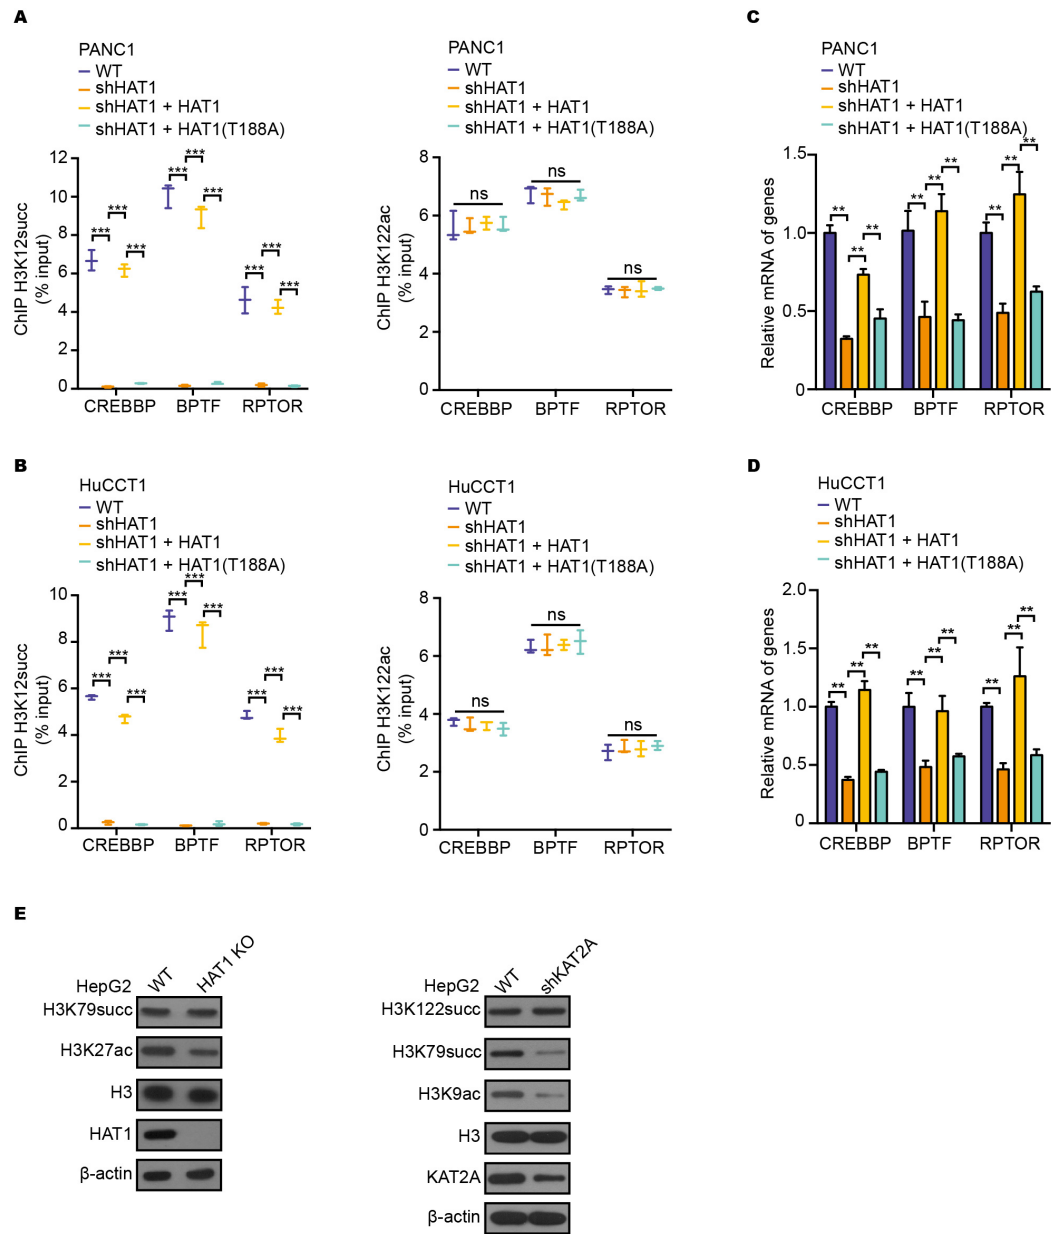

**A**

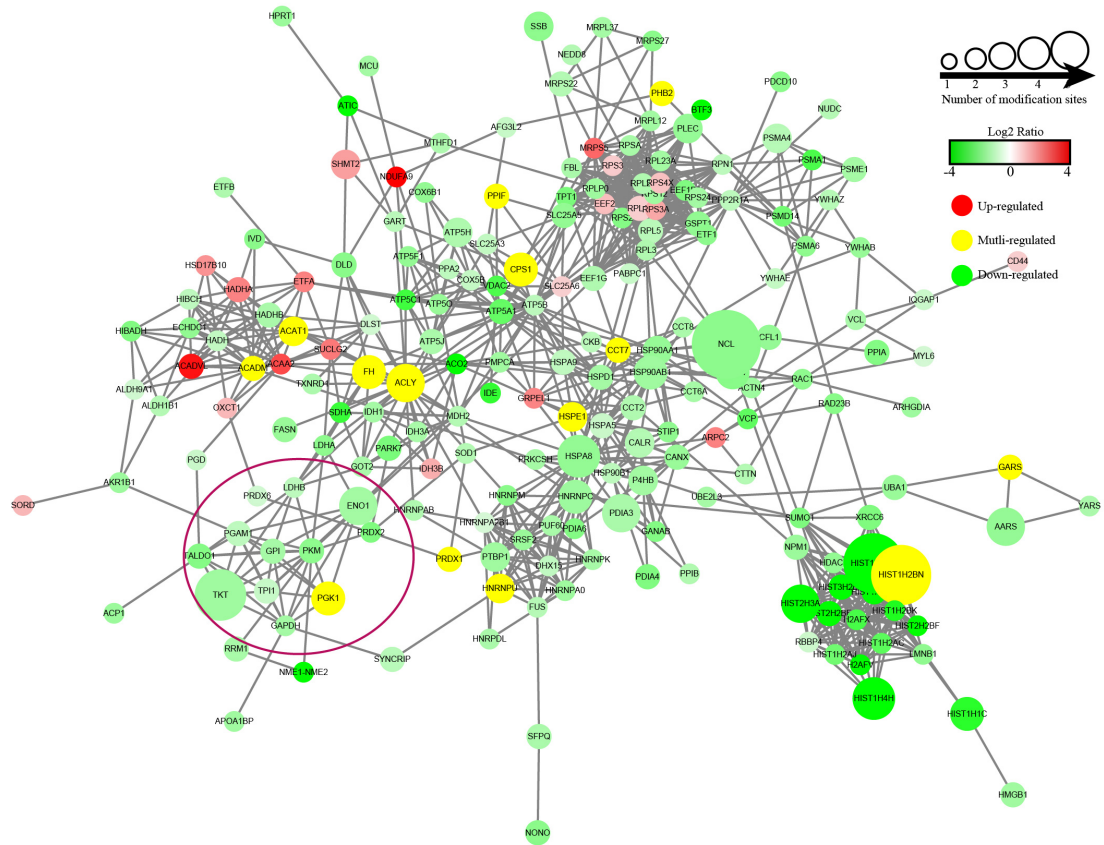

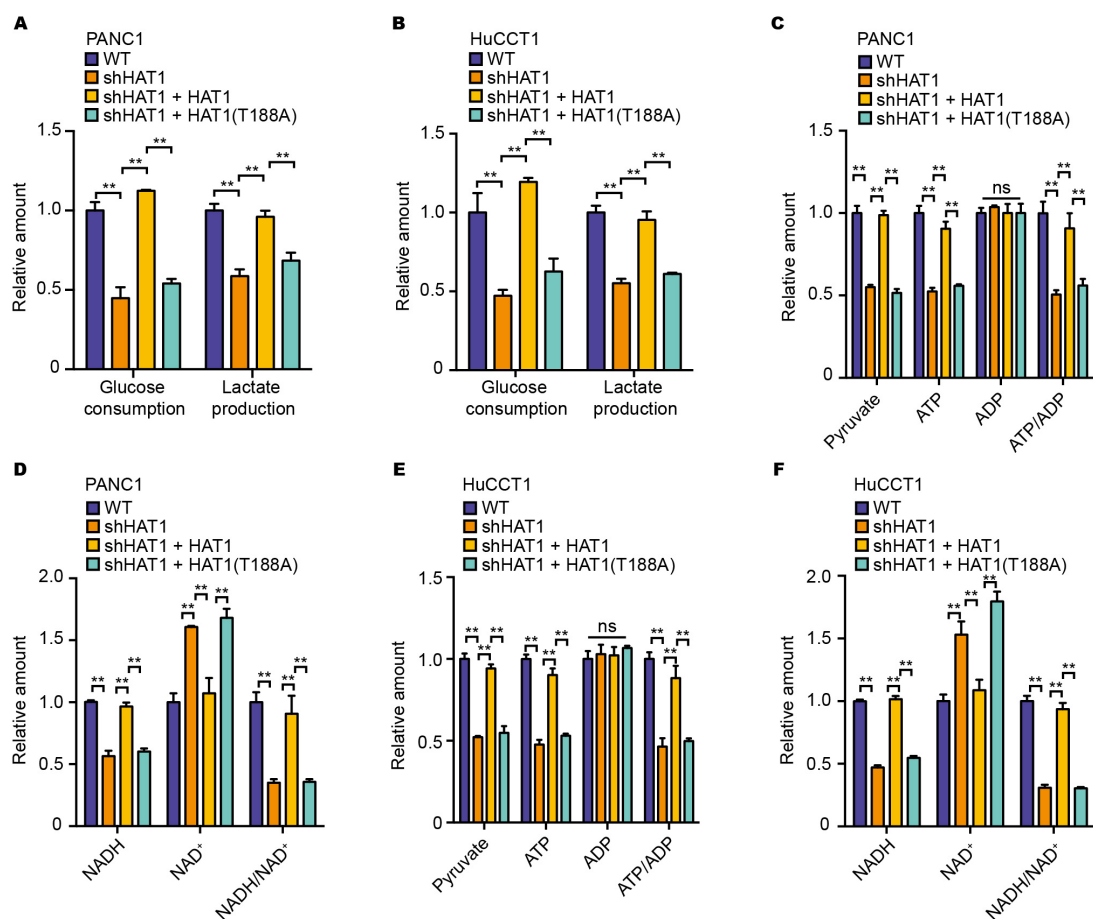

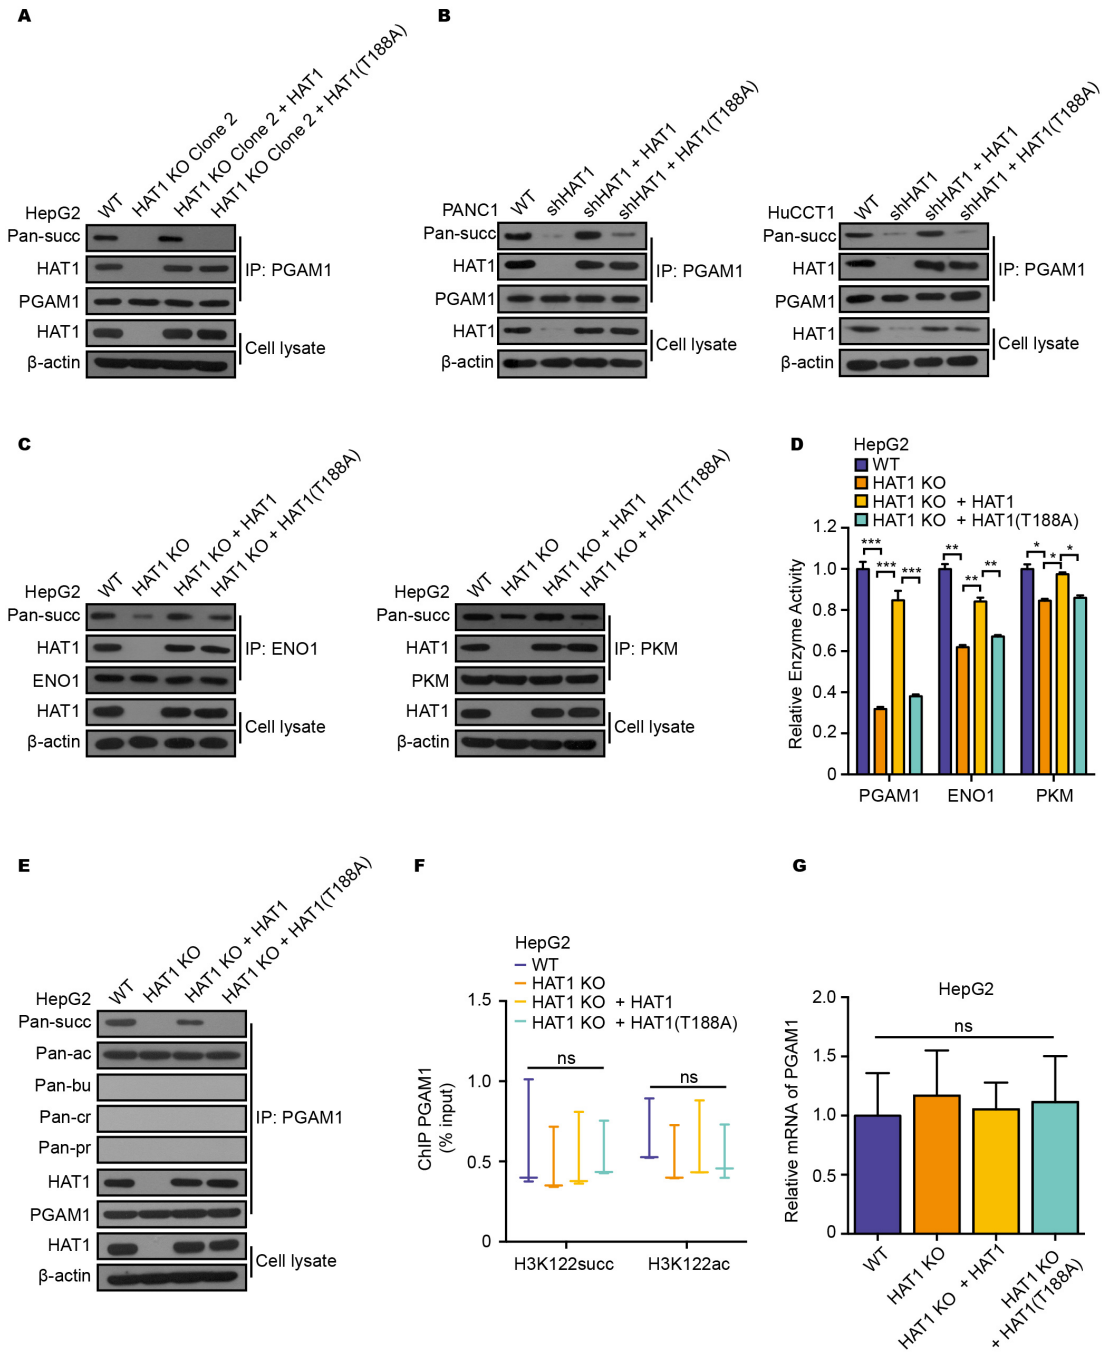

Yang G, et al. Appendix Figure S13

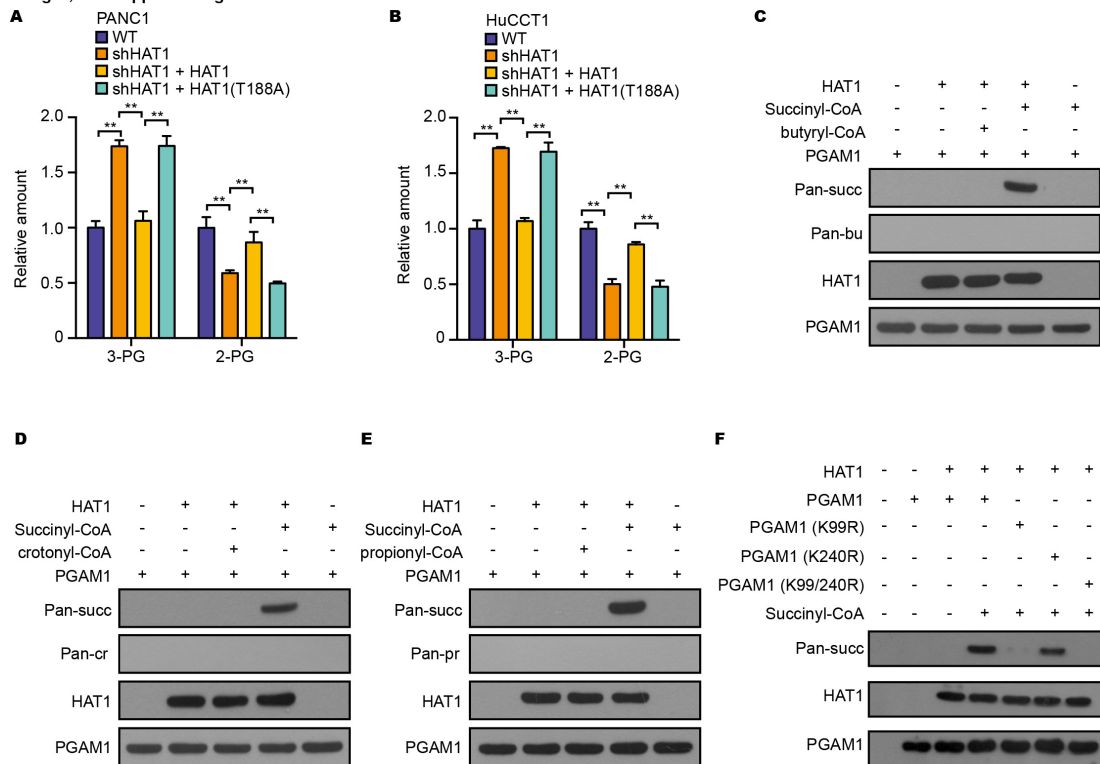

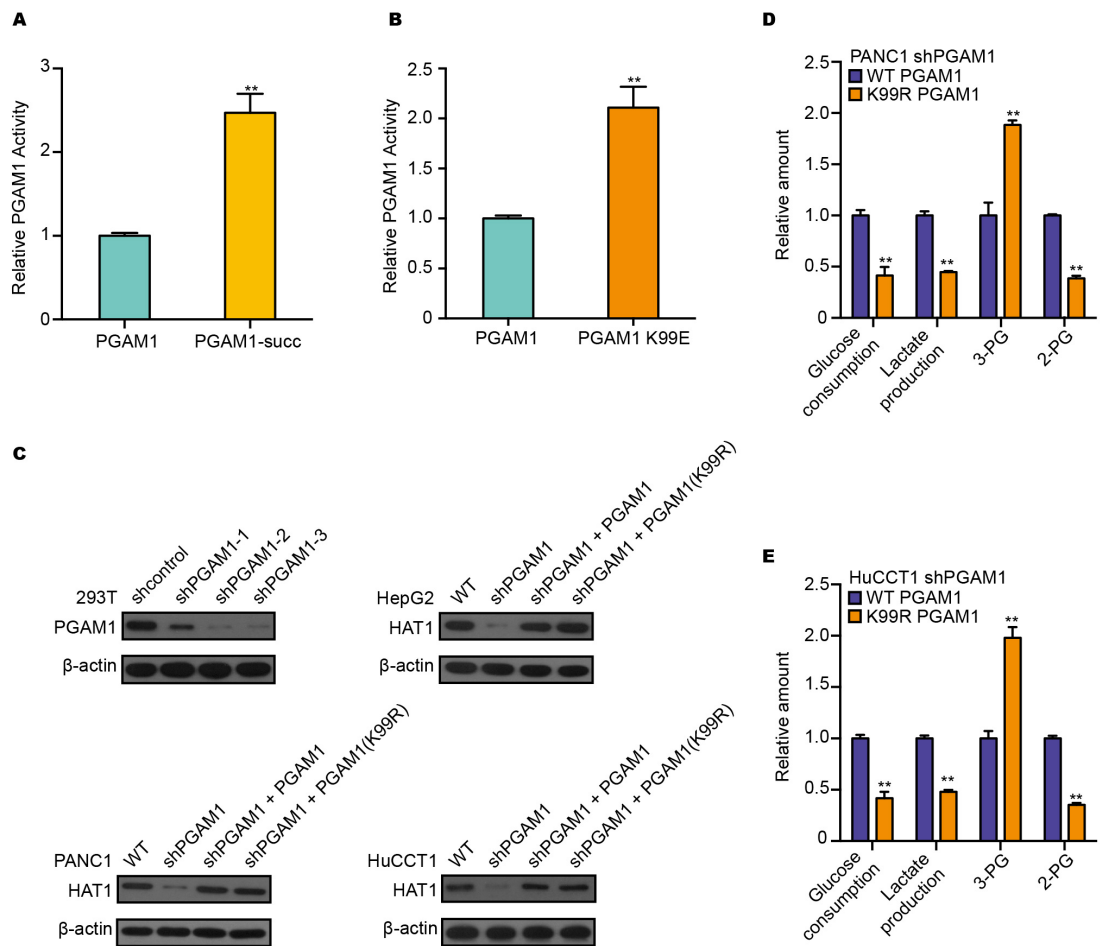

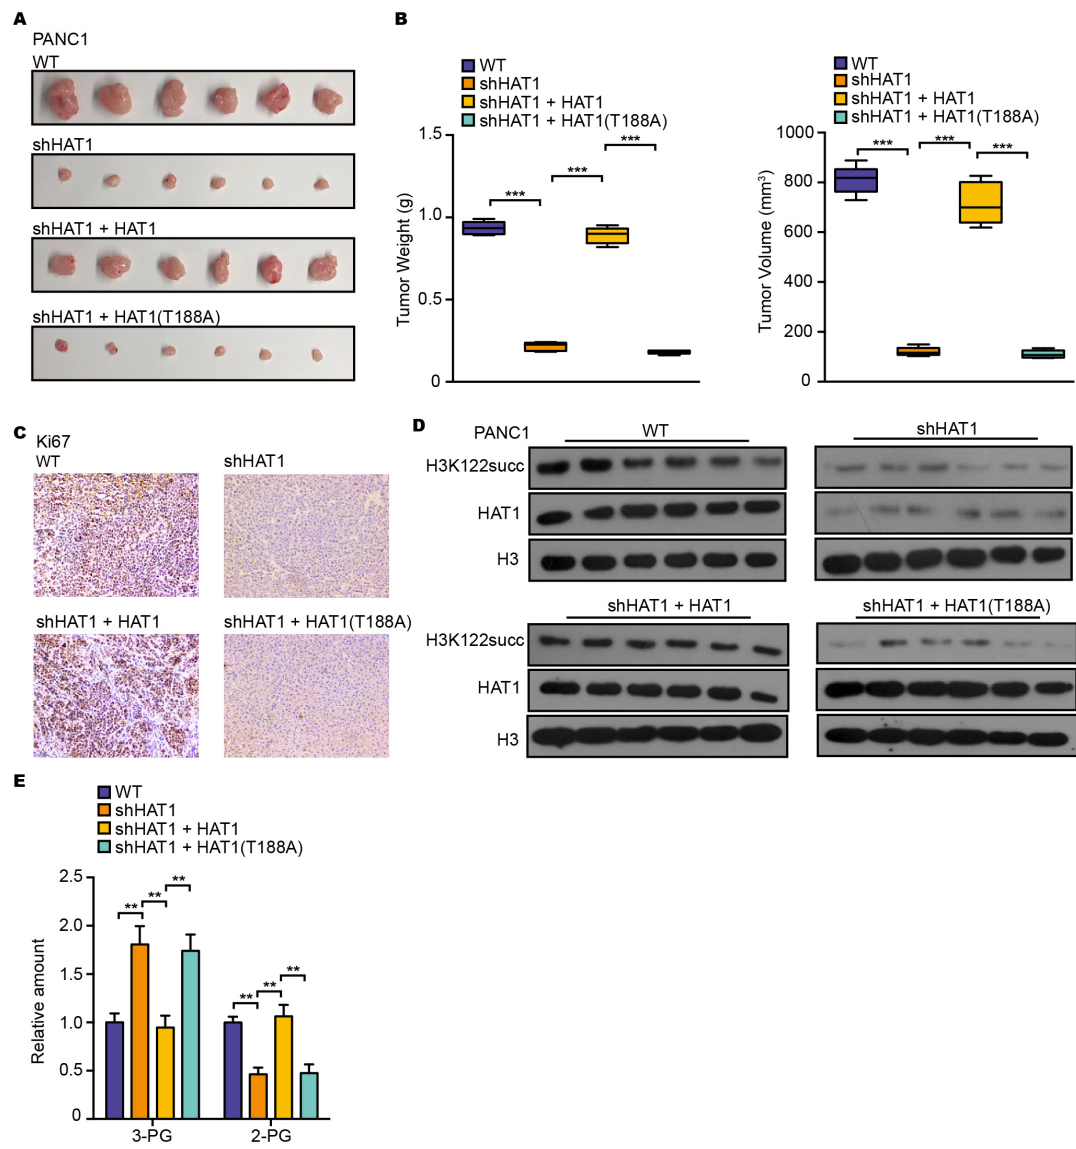

Yang G, et al. Appendix Figure S16

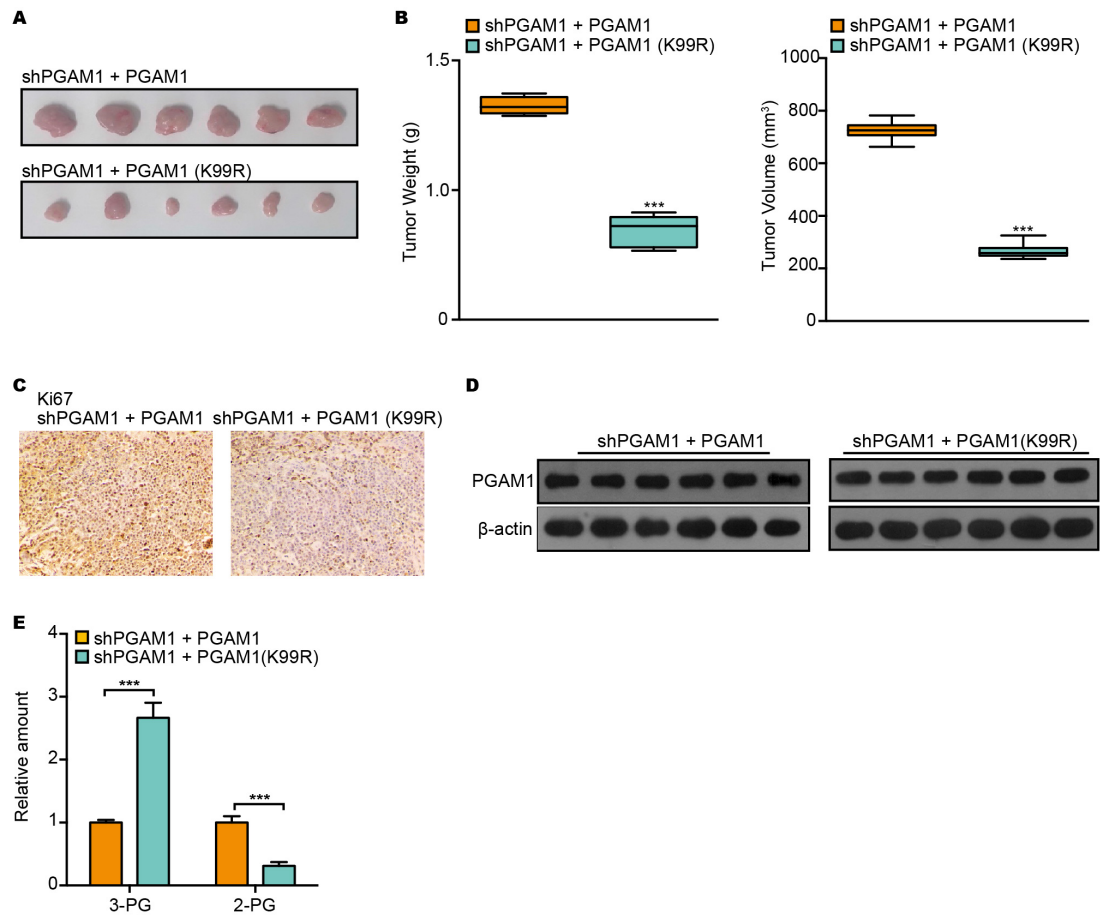

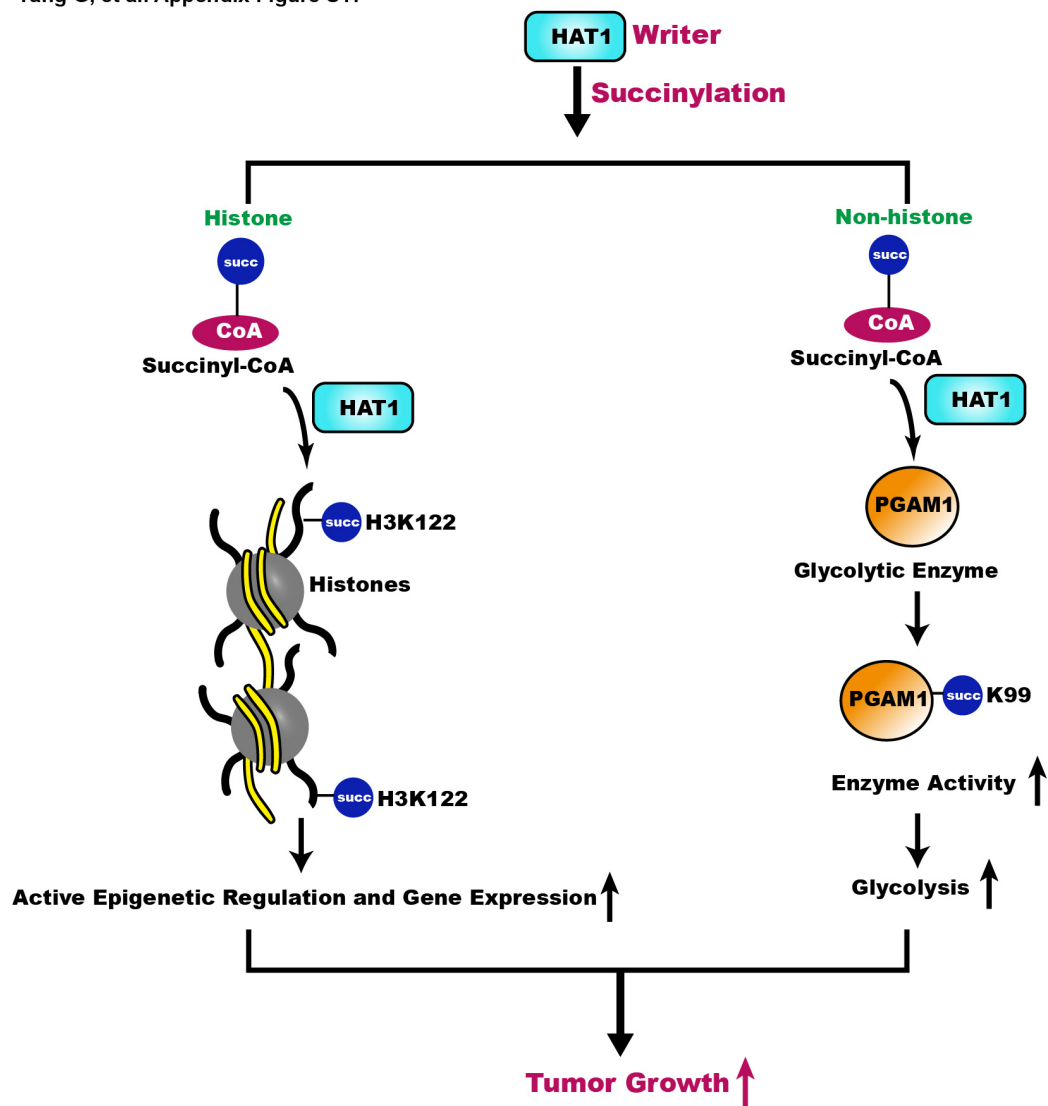

**Appendix Table S1: target sequences of shRNAs**

| <b>shRNAs</b> | <b>Target sequence (5'-3')</b> |
|---------------|--------------------------------|
| shHAT1-1      | GCGTGTTATTGAACGACTTGC          |
| shHAT1-2      | GGTCTAAAGATCCTGTTATAC          |
| shHAT1-3      | GCTACAGACTGGATATTAA            |
| shPGAM1-1     | TTTCTGCTTTATTGAGACCGG          |
| shPGAM1-2     | ATGTTGCTGTAGAAAGGATGG          |
| shPGAM1-3     | CCATCCTTTCTACAGCAACAT          |
| shKAT2A-1     | CGTGCTGTCACCTCGAATGA           |

**Appendix Table S2: Primer list**

| Gene                        | Forward and reverse primer (5'-3')                                                                            |
|-----------------------------|---------------------------------------------------------------------------------------------------------------|
| <b>PCR</b>                  |                                                                                                               |
| CREBBP mRNA                 | TGAGAACTTGCTGGACGGAC<br>CACTGAGGCTGGCCATGTTA                                                                  |
| BPTF mRNA                   | CCCAGGTGGTGATGAAGCAT<br>TTCTGACACCGATCACAGCC                                                                  |
| RPTOR mRNA                  | TCTGTCGGCATCTTCCCCTA<br>CCAGCTCGCTGTCCACTG                                                                    |
| PGAM1 mRNA                  | TTGAATACAGCGACCCAGTGG<br>CTATCGATGTACAGCCGAATGGTG                                                             |
| GAPDH                       | ACCAACTGCTTAGCCC<br>CCACGACGGACACATT                                                                          |
| CREBBP promoter             | CTAGTGTCACGAGGTAGGGC<br>GGAATGGCCTCTGCAGGTTA                                                                  |
| BPTF promoter               | TCAGGGTTGAGTCGCTGTGA<br>AGAGAGACAAGCCCCCTGAA                                                                  |
| RPTOR promoter              | ACAAGAGGCTTGCCTCCAC<br>CCGACAGACCAAACCTCCTC                                                                   |
| PGAM1 promoter              | CACCTCTCCAGTTACTAAATTCCAT<br>CTGTTCTTCTCCGAGCCCCAATCAG                                                        |
| <b>Plasmid construction</b> |                                                                                                               |
| HAT1-WT                     | CGCGGATCCATGGCGGGATTTGGTGCTATGG<br>CCGCTCGAGTTACTCTTGAGCAAGTCGTTCA                                            |
| HAT1 (I186E)                | GCTTCAGACCTTTTTGATGTGGTTTGAGGAACTGCTAGCTTTATTGACGTGG<br>CCACGTCAATAAAGCTAGCAGTTTCCTCAAACCACATCAAAAAGGTCTGAAGC |
| HAT1 (T188A)                | GACCTTTTTGATGTGGTTTATTGAAGCTGCTAGCTTTATTGACGT<br>ACGTCAATAAAGCTAGCAGCTTCAATAAACCACATCAAAAAGGTC                |
| HAT1 (S190A)                | TGATGTGGTTTATTGAAACTGCTGCCTTTATTGACGTGGATGATGAAAG<br>CTTTCATCATCCACGTCAATAAAGGCAGCAGTTTCAATAAACCACATCA        |
| HAT1 (M241K)                | GCCACGTGTAAGTCAGAAGCTGATTTTGACTCCAT<br>ATGGAGTCAAAATCAGCTTCTGACTTACACGTGGC                                    |
| HAT1 (K249R)                | TGATTTTGACTCCATTTCAAGCTCAAGGCCATGGTGC<br>GCACCATGGCCTTGAGCTTGAAATGGAGTCAAAATCA                                |
| HAT1 (G251A)                | TCCATTTCAAGGTCAAGCCCATGGTGCTCAACTTC<br>GAAGTTGAGCACCATGGGCTTGACCTTGAAATGGA                                    |
| HAT1 (G253A)                | TTCAAGGTCAAGGCCATGCTGCTCAACTTCTTGAA<br>TTCAAGAAGTTGAGCAGCATGGCCTTGACCTTGAA                                    |

---

|                    |                                                 |
|--------------------|-------------------------------------------------|
| HAT1 (A254E)       | CAAGGTCAAGGCCATGGTGAACAACCTTCTTGAAACAGTTC       |
|                    | GAACTGTTTCAAGAAGTTGTTACCATGGCCTTGACCTTG         |
| HAT1 (E276A)       | AGTTCTTGATATTACAGCGGCAGATCCATCCAAAAGCTATG       |
|                    | CATAGCTTTTGGATGGATCTGCCGCTGTAATATCAAGAACT       |
| HAT1 (S279A)       | ATATTACAGCGGAAGATCCAGCCAAAAGCTATGTGAAATTACG     |
|                    | CGTAATTTACATAGCTTTTGGCTGGATCTTCCGCTGTAATAT      |
| HAT1 (S281A)       | CAGCGGAAGATCCATCCAAAGCCTATGTGAAATTACGAGACT      |
|                    | AGTCTCGTAATTTACATAGGCTTTGGATGGATCTTCCGCTG       |
| HAT1 (F288A)       | AAGCTATGTGAAATTACGAGACGCTGTGCTTGTGAAGCTTTGTCAAG |
|                    | CTTGACAAAGCTTCACAAGCACAGCGTCTCGTAATTTACATAGCTT  |
| PGAM1-WT           | CGCGGATCCATGGCCGCCTACAAACTGGTG                  |
|                    | CCGCTCGAGTCACTTCTTGGCCTTGCCCTG                  |
| PGAM1 (K99E)       | GGGTCTAACCGGTCTCAAAAAAGCAGAAACTGCTG             |
|                    | CAGCAGTTTCTGCTTTTTTGGAGACCGGTTAGACCC            |
| <b>CRISPR/Cas9</b> |                                                 |
| HAT1-sgRNA-1       | GACCGTAGGCTGACATGACATGTAG                       |
|                    | AAACCTACATGTCATGTCAGCCTAC                       |
| HAT1-sgRNA-2       | GACCGGCTACGCTCTTTGCGACCGT                       |
|                    | AAACACGGTCGCAAAGAGCGTAGCC                       |

---

**Appendix Table S3: antibodies used in this study**

| <b>Antibodies</b>                  | <b>Origin</b>            | <b>Applications</b> |
|------------------------------------|--------------------------|---------------------|
| HAT1                               | Proteintech 11432-1-AP   | Western blot        |
| HAT1                               | Abcam ab194296           | IP, ChIP            |
| H3                                 | Abcam ab1791             | Western blot, IP    |
| Pan Kac                            | PTMBIO PTM-105           | Western blot,       |
| Pan Kac                            | Abcam ab21623            | IP                  |
| Pan Ksucc                          | PTMBIO PTM-419           | Western blot, IP    |
| Pan Bu                             | PTMBIO PTM-301           | Western blot, IP    |
| Pan Pr                             | PTMBIO PTM-201           | Western blot, IP    |
| Pan Cr                             | PTMBIO PTM-501           | Western blot, IP    |
| H3K122succ                         | PTMBIO PTM-413           | Western blot, ChIP  |
| H3K79succ                          | PTMBIO PTM-412           | Western blot        |
| H3K27ac                            | Abcam ab4729             | Western blot        |
| H3K122ac                           | Affinity AF4362          | Western blot, ChIP  |
| PGAM1                              | Proteintech 16126-1-AP   | Western blot, IP    |
| ENO1                               | Proteintech 55237-1-AP   | Western blot, IP    |
| PKM                                | Proteintech 25659-1-AP   | Western blot, IP    |
| IgG Polyclonal Antibody            | Abcam ab6789             | ChIP, IP            |
| Flag tag Monoclonal Antibody       | Sigma-Aldrich SAB4200071 | IP                  |
| Ki-67 Polyclonal Antibody          | Proteintech 27309-1-AP   | IHC                 |
| His-Tag Monoclonal Antibody        | Proteintech 66005-1-Ig   | IP                  |
| $\beta$ -actin Monoclonal Antibody | Sigma-Aldrich A2228      | Western blot        |

**Appendix Table S4: Stoichiometry of succinylation on glycolytic enzymes**

| <b>Protein</b> | <b>Succinylation site</b> | <b>Stoichiometry in HepG2 cells<br/>(mean, %)</b> | <b>Stoichiometry in HAT1-knockout HepG2 cells<br/>(mean, %)</b> |
|----------------|---------------------------|---------------------------------------------------|-----------------------------------------------------------------|
| PGAM1          | K99                       | 62.0                                              | 47.1                                                            |
| PGAM1          | K240                      | 26.3                                              | 18.1                                                            |
| ENO1           | K232                      | 53.9                                              | 38.4                                                            |
| PKM            | K310                      | 20.7                                              | 13.0                                                            |
| PGK1           | K352                      | 21.2                                              | 12.7                                                            |
| GPI            | K123                      | 18.8                                              | 12.7                                                            |
| GAPDH          | K226                      | 9.4                                               | 6.0                                                             |
| TPI            | K178                      | 49.5                                              | 40.7                                                            |
